# Supplementary figures and images for: Third-Generation Anticancer Photodynamic Therapy Systems Based on Star-like Anionic Polyacrylamide Polymer, Gold Nanoparticles, and Temoporfin Photosensitizer
Source: MDPI journal article supplement (doi:10.3390/molecules29102224), 2024-05-09

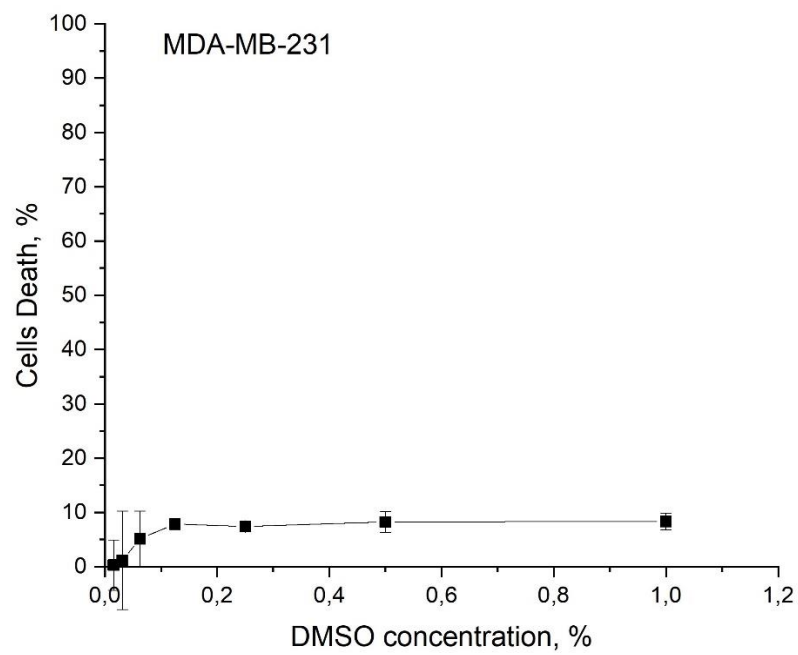

**Figure S1.** Cytotoxicity of DMSO depending on the concentration for MDA-MB-231 cells.

Supplement: s1 [file s1]
